# Supplementary material
Source: PubMed Central journal article supplement (PMC3320042)
Supplement: NIHMS322232-supplement-1.pdf [file NIHMS322232-supplement-1.pdf]

**Innate lymphoid cells promote lung tissue homeostasis  
following acute influenza virus infection**

Laurel A. Monticelli<sup>1,2</sup>, Gregory F. Sonnenberg<sup>1,2</sup>, Michael C. Abt<sup>1,2</sup>, Theresa Alenghat<sup>1,2</sup>, Carly G.K. Ziegler<sup>1</sup>, Travis A. Doering<sup>1</sup>, Jill M. Angelosanto<sup>1</sup>, Brian J. Laidlaw<sup>1</sup>, Cliff Y. Yang<sup>3</sup>, Taheri Sathaliyawala<sup>4</sup>, Masaru Kubota<sup>4</sup>, Damian Turner<sup>4</sup>, Joshua M. Diamond<sup>5</sup>, Ananda W. Goldrath<sup>3</sup>, Donna L. Farber<sup>4</sup>, Ronald G. Collman<sup>5</sup>, E. John Wherry<sup>1</sup> & David Artis<sup>1,2</sup>

<sup>1</sup> Department of Microbiology and Institute for Immunology, Perelman School of Medicine, University of Pennsylvania, Philadelphia, PA 19104, USA.

<sup>2</sup> Department of Pathobiology, School of Veterinary Medicine, University of Pennsylvania, Philadelphia, PA 19104, USA.

<sup>3</sup> Department of Biology, University of California San Diego, La Jolla, CA 92037, USA.

<sup>4</sup> Department of Surgery and the Columbia Center for Translational Immunology, Columbia University Medical Center, New York, NY 10032, USA.

<sup>5</sup> Department of Medicine, School of Medicine, University of Pennsylvania, Philadelphia, PA 19104, USA.

## Supplementary Figures

### Supplementary figure 1. Weight loss, lung function decline and early immunopathology are similar between influenza virus-infected wild-type and *Rag1*<sup>-/-</sup> mice

(a-c) WT C57BL/6 or *Rag1*<sup>-/-</sup> were infected with 0.5 LD<sub>50</sub> PR8 i.n. and assessed for weight loss (a) and lung function by pulse oximetry (b). (c) Lung histological sections from naïve, WT or *Rag1*<sup>-/-</sup> mice at day 10 post infection (p.i.), stained with H&E. (a-c) Data shown is combination of 5 experiments, n = 3-5 mice per experiment. Scale bar = 100 μm.

### Supplementary figure 2. Reduced eosinophilia and IL-5 levels in anti-CD90.2-treated mice during influenza virus infection

(a) Absolute cell numbers of neutrophils and eosinophils in the BAL fluid of isotype, anti-NK1.1 or anti-CD90.2 mAb-treated *Rag1*<sup>-/-</sup> mice at day 10 post PR8 influenza virus infection. (b) mRNA expression of IL-5 in lung tissue from naïve or antibody-treated influenza-infected *Rag1*<sup>-/-</sup> mice at day 10 post infection. mRNA expression levels normalized to β-actin and shown relative to expression levels in naïve mice. Data is representative of 3 experiments, n = 4 mice. \* p < 0.05

### Supplementary figure 3. CD90.2 expression on innate cell populations

Representative flow cytometry plots of CD90.2 expression on neutrophils (Ly6G<sup>+</sup>), eosinophils (Siglec F<sup>+</sup>), dendritic cells (CD11c<sup>+</sup>), and macrophages (CD11b<sup>+</sup>) in the lung at day 10 post PR8 influenza infection virus infection, gated on live cells. Data is representative of 3 independent experiments, n = 3-4 mice.

### Supplementary figure 4. Administration of recombinant IL-13 fails to restore lung function in ILC-depleted mice

(a-c) *Rag1*<sup>-/-</sup> mice were infected with 0.5 LD<sub>50</sub> PR8 influenza virus and treated with isotype mAb, anti-CD90.2 mAb or anti-CD90.2 + rIL-13 (5-10 μg i.p. every 2 days starting at D0). (a)

Measurement of IL-13 protein in the BAL fluid, N.D. not detected. **(b)** Histological analysis of lung tissue from antibody-treated mice at 10 days p.i. Black arrows denote regions of goblet cell hyperplasia. Scale bar = 50  $\mu\text{m}$ . **(c)** Measurement of blood oxygen saturation levels by pulse oximetry. **(a-c)** Data is representative of 2 independent experiments, n = 4 mice.

**Supplementary figure 5. IL-22 is not required for respiratory tissue remodeling following influenza virus infection**

Weight loss **(a)** and pulse oximetry **(b)** of wild-type mice treated with isotype or anti-IL-22 mAb (200  $\mu\text{g}$ ) during PR8 influenza infection (0.5 LD<sub>50</sub>). **(c)** H&E stained lung sections from antibody-treated mice at day 10 post influenza infection. **(a-c)** Data is representative of 2 independent experiments, n = 4 mice. Scale bar = 100  $\mu\text{m}$

**Supplementary figure 6. Treatment with amphiregulin protein does not affect IL-5 and IL-13 cytokine levels in ILC-depleted mice**

**(a-b)** *Rag1*<sup>-/-</sup> mice were infected with 0.5 LD<sub>50</sub> PR8 influenza virus and treated with isotype mAb, anti-CD90.2 mAb or anti-CD90.2 mAb + recombinant murine amphiregulin (5-10  $\mu\text{g}$  i.p. every 2 days starting at D0). Measurement of IL-5 **(a)** and IL-13 **(b)** mRNA expression levels in lung at day 10 p.i., normalized to  $\beta$ -actin and expressed relative to naïve expression levels. **(a-b)** Data is representative of 2 independent experiments, n = 4 mice.

**Supplementary Table 1. GO term gene list enriched in lung ILC and splenic LTi cell gene expression signatures**

**Supplementary Table 2. Top gene transcripts (“leading edge”) in LPS-treated lung GSEA data set**

## Supplementary figure 1

**a**

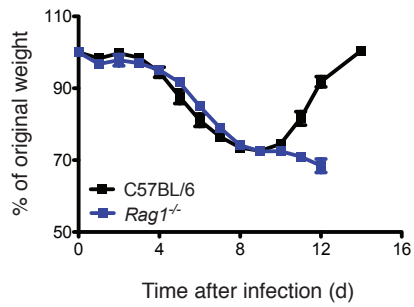

**b**

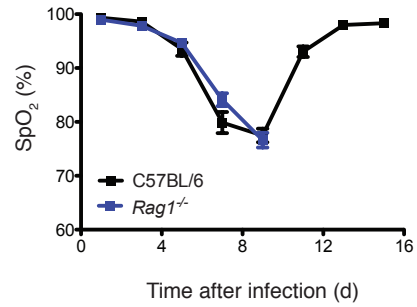

**c**

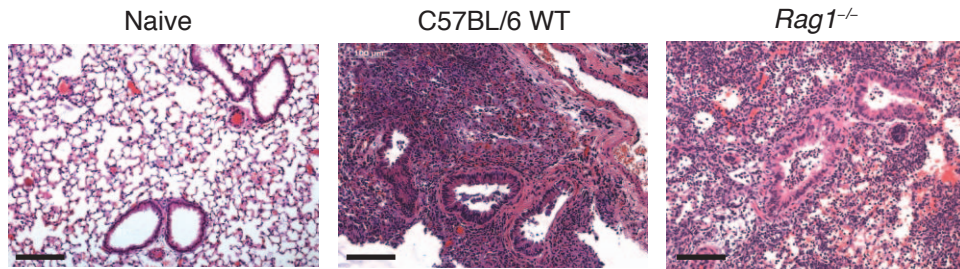

## Supplementary figure 2

**a**

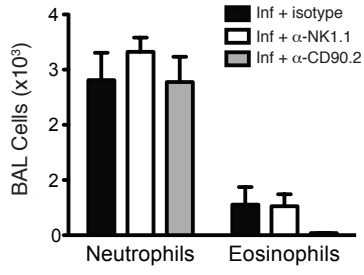

**b**

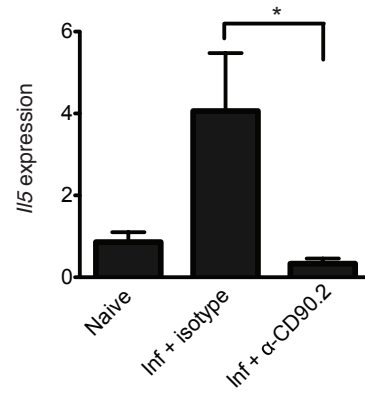

Supplementary figure 3

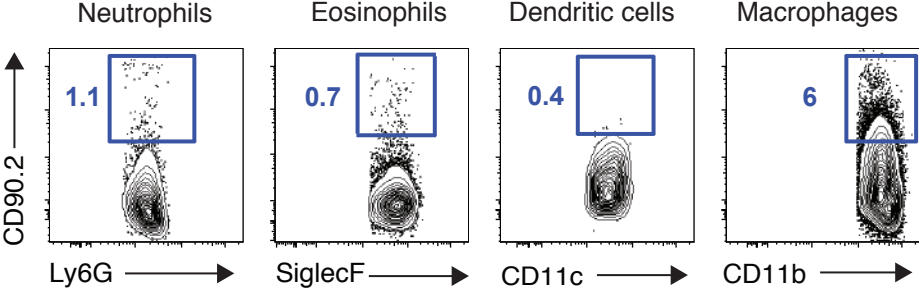

## Supplementary figure 4

**a**

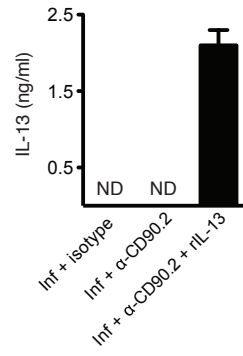

**b**

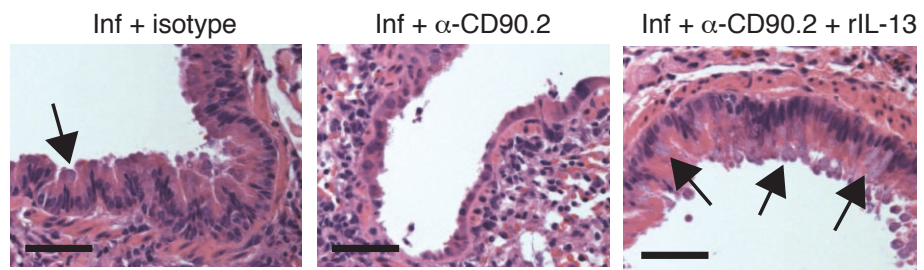

**c**

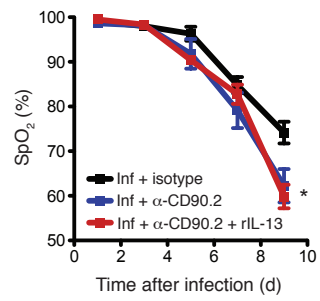

## Supplementary figure 5

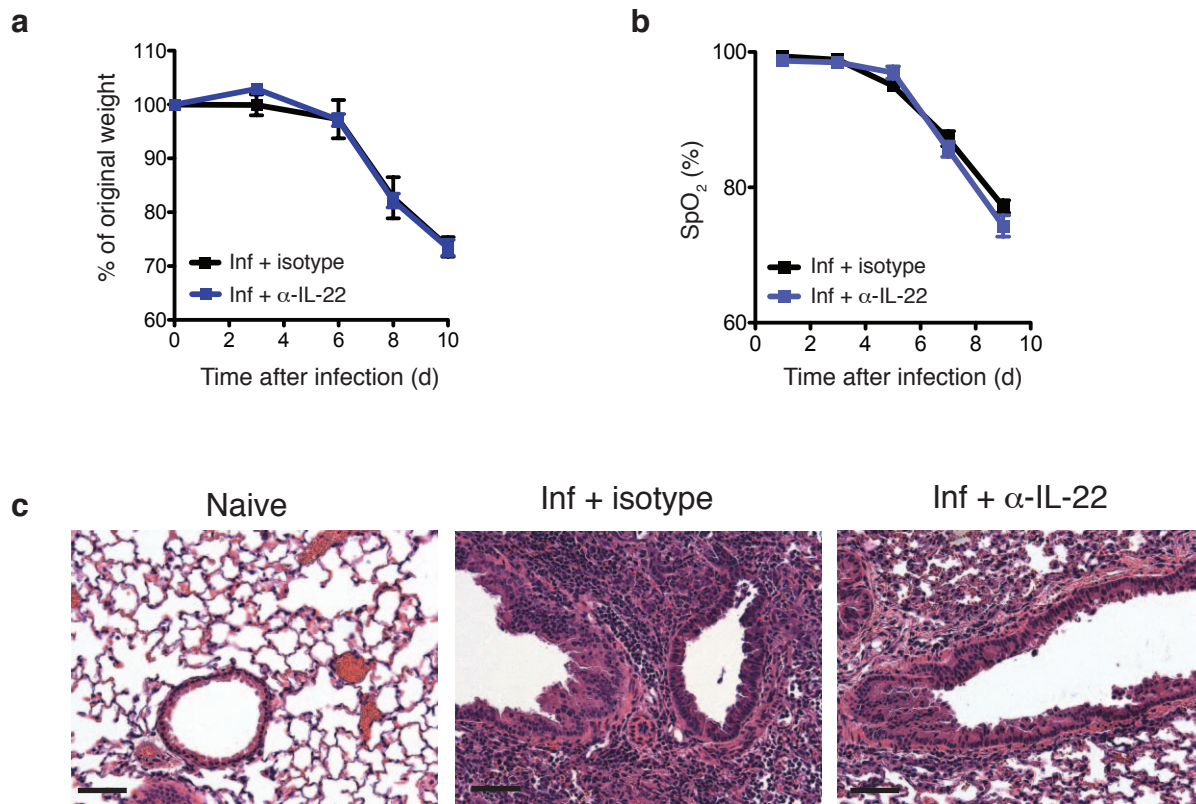



Supplementary figure 6

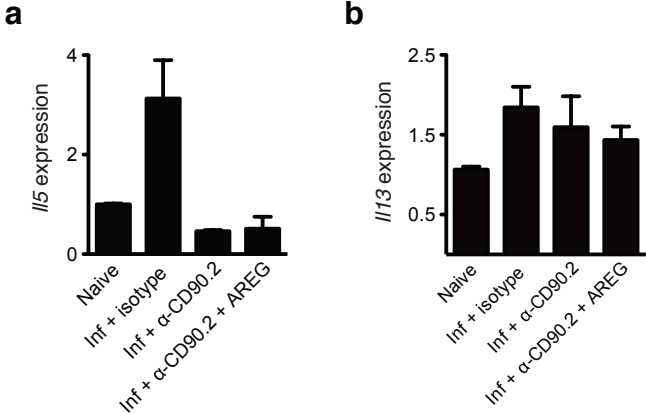

**Supplemental Table 1: GO term gene list enriched in lung ILC or splenic LTi gene expression signatures**

| ILC Enriched                     |                  |                      |                       | LTi Enriched    |                                             |                 |
|----------------------------------|------------------|----------------------|-----------------------|-----------------|---------------------------------------------|-----------------|
| regulation of cell proliferation | defense response | response to wounding | inflammatory response | immune response | hematopoietic or lymphoid organ development | cell activation |
| CSF2                             | CXCL1            | CXCL1                | CXCL1                 | IL1F9           | STAP1                                       | FYB             |
| CAV1                             | RARRES2          | NFKBID               | NFKBID                | IL1R1           | TGFBR1                                      | KLRK1           |
| FOSL2                            | NFKBID           | C3                   | C3                    | SUSD2           | G6PDX                                       | MYO1F           |
| FGF7                             | C3               | CXCL3                | CXCL3                 | PGLYRP1         | RORC                                        | RORC            |
| PTGS2                            | CXCL3            | PPARG                | CXCL2                 | CD74            | VAV1                                        | SKAP2           |
| CSF1                             | PPARG            | TLR1                 | TLR1                  | TMEM173         | CD74                                        | VAV1            |
| PPARG                            | TLR1             | CXCL2                | PPARG                 | FCER1G          | HBA-A1                                      | CD74            |
| NFKBIA                           | CXCL2            | GJA1                 | C1S                   | CD4             | ZFP826                                      | CXCR5           |
| CD24A                            | C1S              | C1S                  | CD24A                 | BCL6            | HBA-A2                                      | VAMP7           |
| SCGB1A1                          | PRDX1            | TIMP3                | TGFB1                 | CLEC4D          | CXCR5                                       | PLCG2           |
| TGFB1                            | CD24A            | CD24A                | CALCA                 | MPA2L           | MFSD7B                                      | FCER1G          |
| ADA                              | TGFB1            | TGFB1                | CFH                   | LTB             | PLCG2                                       | CD4             |
| CDH5                             | CALCA            | CALCA                | THBS1                 | LTA,            | CD4                                         | BCL6            |
| LIF                              | SH2D1A           | ARG1                 | NFKBIZ                | CD7             | BCL6                                        | H2-DMA          |
| SPRY2                            | CFH              | CFH                  | IL6                   | RAB27A          | HBB-B1                                      | HDAC9           |
| GPC3                             | THBS1            | THBS1                | IL5                   | IGH             | H2-DMA                                      | RAB27A          |
| GATA3                            | NFKBIZ           | NFKBIZ               | CCL21A                | IL18R1          | HDAC9                                       | LTB             |
| BCL11B                           | IL6              | IL6                  | SERPING1              | IRGM1           | LTB                                         | LTA             |
| CALCRL                           | IL5              | IL5                  | CCL11                 | IL23R           | LTA                                         | HELLS           |
| MYC                              | IL1RL1           | CCL21A               | HIF1A                 | LY96            | HELLS                                       |                 |
| DPT                              | CCL21A           | SERPING1             | CCR5                  | IGJ             |                                             |                 |
| KLF5                             | SERPING1         | PLAUR                | CCR4                  | MYO1F           |                                             |                 |
| IRS2                             | COTL1            | CCL11                | CXCL15                | H2-AB1          |                                             |                 |
| AR                               | CCL11            | THBD                 | CCR2                  | VAV1            |                                             |                 |
| IL6                              | HIF1A            | HIF1A                | ALOX5                 | H2-DMB2         |                                             |                 |
| SPARC                            | PENK             | CCR5                 | KDM6B                 | TNFSF8          |                                             |                 |
| PROX1                            | CCR5             | CCR4                 |                       | PSMB9           |                                             |                 |
| HES1                             | CCR4             | CXCL15               |                       | BTLA,           |                                             |                 |
| PRKCQ                            | CXCL15           | CCR2                 |                       | VAMP7           |                                             |                 |
| ADRB2                            | CCR2             | ALOX5                |                       | H2-EB1          |                                             |                 |
| CDKN1A                           | ALOX5            | PROS                 |                       | PLCG2           |                                             |                 |
| RBPJ                             | RBPJ             | KDM6B                |                       | H2-AA           |                                             |                 |
| KLF4                             | KDM6B            |                      |                       | GBP4            |                                             |                 |
| BMPR1A                           |                  |                      |                       | H2-DMA          |                                             |                 |
| NFIB                             |                  |                      |                       |                 |                                             |                 |
| IL2                              |                  |                      |                       |                 |                                             |                 |

**Supplementary Table 2: Top gene transcripts (“leading edge”) in LPS-treated Lung GSEA data set**

| <b>GSEA leading edge genes</b> |
|--------------------------------|
| Cxcl2                          |
| Tnfaip3                        |
| Myc                            |
| Csf2                           |
| Tiparp                         |
| Fgl2                           |
| Gadd45b                        |
| Cdkn1a                         |
| Chd7                           |
| Ctla2b                         |
| Aim1                           |
| <b>Areg</b>                    |
| Nr4a1                          |
| Ccr2                           |
| Ptgir                          |
| Skil                           |
| Tlr1                           |
| Calca                          |
| Fosl2                          |
